# Supplementary material for: Immediate Mood Scaler: Tracking Symptoms of Depression and Anxiety Using a Novel Mobile Mood Scale
Source: PubMed Central journal article supplement (PMC5406620; doi:10.2196/mhealth.6544), 2017-04-12
Supplement: mhealth_v5i4e44_app1.pdf [file mhealth_v5i4e44_app1.pdf]

**Multimedia Appendix 1. A complete list of the Immediate Mood Scaler (IMS) items.**

---

| <b>IMS Item</b> |             |            |
|-----------------|-------------|------------|
| <b>q1</b>       | Depressed   | Happy      |
| <b>q2</b>       | Distracted  | Focused    |
| <b>q3</b>       | Worthless   | Valuable   |
| <b>q4</b>       | Lonely      | Engaged    |
| <b>q5</b>       | Sleepy      | Alert      |
| <b>q6</b>       | Slow        | Speedy     |
| <b>q7</b>       | Tired       | Energetic  |
| <b>q8</b>       | Pessimistic | Optimistic |
| <b>q9</b>       | Apathetic   | Motivated  |
| <b>q10</b>      | Guilty      | Proud      |
| <b>q11</b>      | Numb        | Interested |
| <b>q12</b>      | Withdrawn   | Welcoming  |
| <b>q13</b>      | Frustrated  | Peaceful   |
| <b>q14</b>      | Impulsive   | Careful    |
| <b>q15</b>      | Moody       | Stable     |
| <b>q16</b>      | Hopeless    | Hopeful    |
| <b>q17</b>      | Irritable   | Easy-going |
| <b>q18</b>      | Tense       | Relaxed    |
| <b>q19</b>      | Worried     | Untroubled |
| <b>q20</b>      | Fearful     | Fearless   |
| <b>q21</b>      | Anxious     | Peaceful   |
| <b>q22</b>      | Restless    | Calm       |

---
