# Supplementary material for: Immediate Mood Scaler: Tracking Symptoms of Depression and Anxiety Using a Novel Mobile Mood Scale
Source: PubMed Central journal article supplement (PMC5406620; doi:10.2196/mhealth.6544), 2017-04-12
Supplement: mhealth_v5i4e44_app3.pdf [file mhealth_v5i4e44_app3.pdf]

Multimedia Appendix 3. Distribution of depression levels, based on PHQ-9 score at baseline for the entire study population (n=110), for the UCSF/EMU participants (n=75) and for the UC Berkeley/PSC participants (n=35).

| Depression Level                       | PHQ-9 Score Range | # of Subjects | Mean Age (y)     | # Female  | % Female     |
|----------------------------------------|-------------------|---------------|------------------|-----------|--------------|
| <b>Entire Study Population (n=110)</b> |                   |               |                  |           |              |
| Minimal                                | 0-4               | 32            | 31±11.8          | 19        | 59.4         |
| Mild                                   | 5-9               | 28            | 30±8.3           | 10        | 35.7         |
| Moderate                               | 10-14             | 27            | 37.3±13.5        | 19        | 70.4         |
| Mod-Severe                             | 15-19             | 12            | 36.2±10.6        | 9         | 75           |
| Severe                                 | 20-27             | 11            | 46.8±6.9         | 7         | 63.6         |
| <b>TOTAL</b>                           |                   | <b>110</b>    | <b>34.1±11.8</b> | <b>64</b> | <b>58.2%</b> |
| <b>UCSF EMU Subjects (n=75)</b>        |                   |               |                  |           |              |
| Minimal                                | 0-4               | 16            | 37.1±11.6        | 10        | 62.5         |
| Mild                                   | 5-9               | 21            | 30±7             | 8         | 38.1         |
| Moderate                               | 10-14             | 22            | 38.9±12.6        | 16        | 72.7         |
| Mod-Severe                             | 15-19             | 8             | 36.4±6.3         | 5         | 62.5         |
| Severe                                 | 20-27             | 8             | 46.8±6.9         | 6         | 75           |
| <b>TOTAL</b>                           |                   | <b>75</b>     | <b>34.1±11.8</b> | <b>45</b> | <b>60%</b>   |
| <b>UCB and PSC Subjects (n=35)</b>     |                   |               |                  |           |              |
| Minimal                                | 0-4               | 16            | 25.3±9.3         | 9         | 56.3         |
| Mild                                   | 5-9               | 7             | 30.3±11.5        | 2         | 28.6         |
| Moderate                               | 10-14             | 5             | 30.2±16.7        | 2         | 40           |
| Mod-Severe                             | 15-19             | 4             | 35.8±17.7        | 4         | 100          |
| Severe                                 | 20-27             | 3             | --               | 1         | 33.3         |
| <b>TOTAL</b>                           |                   | <b>35</b>     | <b>27.5±12.1</b> | <b>18</b> | <b>51.4%</b> |
