# Supplementary material for: Immediate Mood Scaler: Tracking Symptoms of Depression and Anxiety Using a Novel Mobile Mood Scale
Source: PubMed Central journal article supplement (PMC5406620; doi:10.2196/mhealth.6544), 2017-04-12

Multimedia Appendix 4.

Parallel analysis based on 1,000 simulations of raw data.

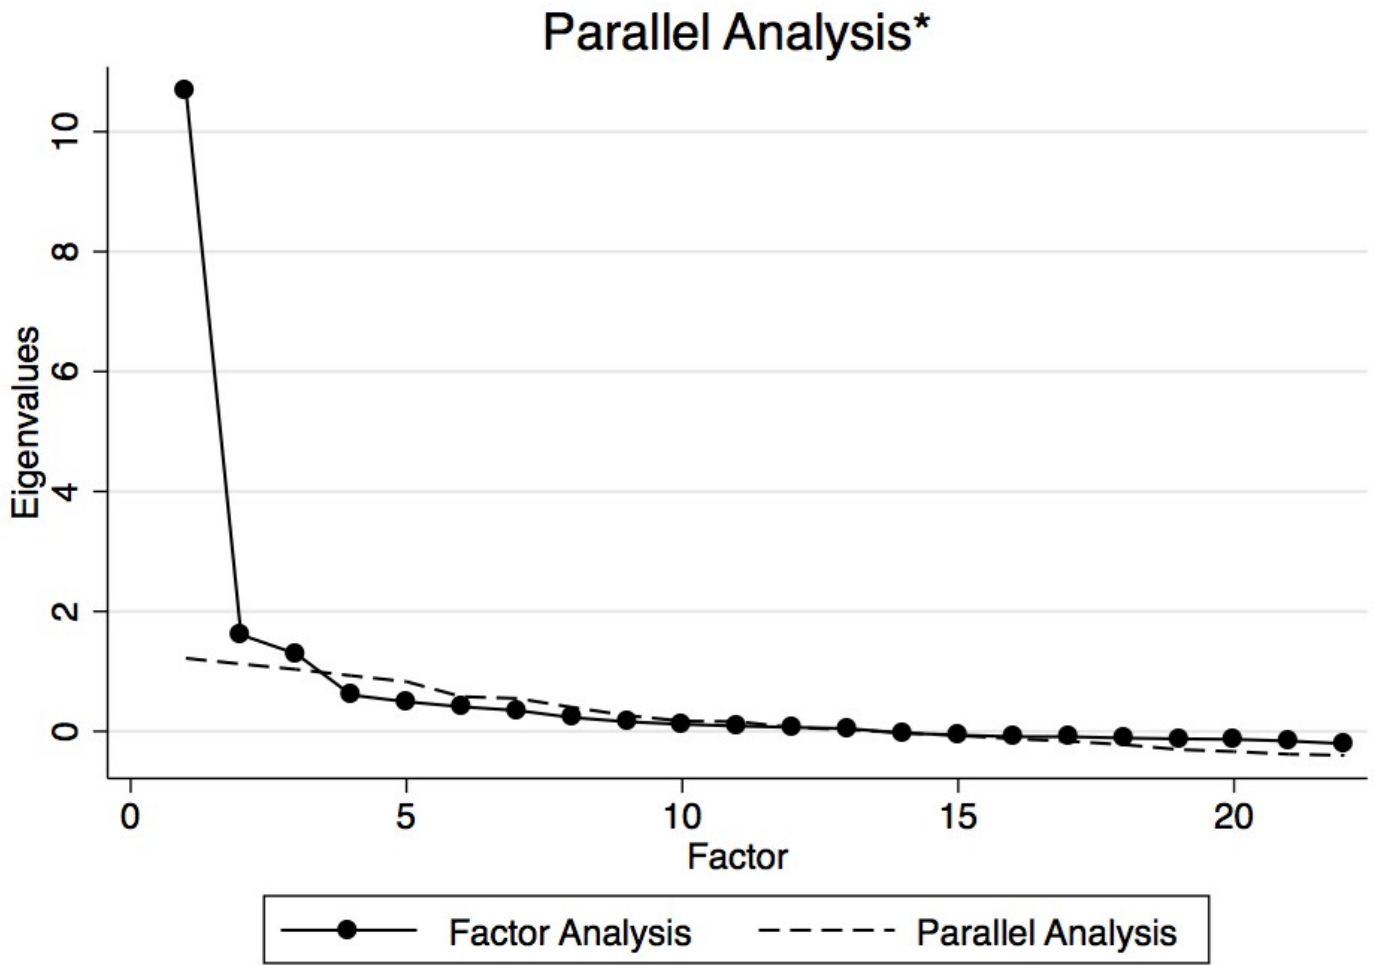

Supplement: mhealth_v5i4e44_app4.pdf [file mhealth_v5i4e44_app4.pdf]
