# Supplementary material for: Immediate Mood Scaler: Tracking Symptoms of Depression and Anxiety Using a Novel Mobile Mood Scale
Source: PubMed Central journal article supplement (PMC5406620; doi:10.2196/mhealth.6544), 2017-04-12
Supplement: mhealth_v5i4e44_app5.pdf [file mhealth_v5i4e44_app5.pdf]

## Multimedia Appendix 5.

### Correlations (Pearson's r) between standardized measures and IMS

|                   | PHQ-9          | GAD-7         | Rumination    | IMS total      | IMS-12         | IMS12_depr     | IMS12_anx |
|-------------------|----------------|---------------|---------------|----------------|----------------|----------------|-----------|
| <b>PHQ-9</b>      | 1              |               |               |                |                |                |           |
| <b>GAD-7</b>      | .78**<br>(99)  | 1             |               |                |                |                |           |
| <b>Rumination</b> | .73**<br>(65)  | .73**<br>(65) | 1             |                |                |                |           |
| <b>IMS total</b>  | .59**<br>(110) | .57**<br>(93) | .57**<br>(64) | 1              |                |                |           |
| <b>IMS-12</b>     | .59**<br>(110) | .54**<br>(93) | .59**<br>(64) | .97**<br>(110) | 1              |                |           |
| <b>IMS12_depr</b> | .57**<br>(110) | .46**<br>(93) | .53**<br>(64) | .88**<br>(110) | .92**<br>(110) | 1              |           |
| <b>IMS12_anx</b>  | .49**<br>(110) | .51**<br>(93) | .53**<br>(64) | .87**<br>(110) | .89**<br>(110) | .64**<br>(110) | 1         |

Note: number of participants (n) appears in parenthesis; \*\* $P < .001$  (two-tailed). Abbreviations: IMS12\_depr: depression subscale of the 12-item IMS; IMS12\_anx: anxiety subscale of the 12-item IMS.
