# Supplementary material for: Immediate Mood Scaler: Tracking Symptoms of Depression and Anxiety Using a Novel Mobile Mood Scale
Source: PubMed Central journal article supplement (PMC5406620; doi:10.2196/mhealth.6544), 2017-04-12
Supplement: mhealth_v5i4e44_app6.pdf [file mhealth_v5i4e44_app6.pdf]

**Multimedia Appendix 6.**

**Model results using IMS-12 Depression and Anxiety subscales for Depression (PHQ-9; top table) and Anxiety (GAD-7; bottom table)**

| IMS-12 Depression (n=17) |         |      |       | IMS-12 Anxiety (n=17) |         |       |       |
|--------------------------|---------|------|-------|-----------------------|---------|-------|-------|
| Model                    | $\beta$ | t    | $P^A$ | Model                 | $\beta$ | t     | P     |
| Time                     | .17     | .81  | .46   | Time                  | .12     | -.38  | .71   |
| + PHQ-9 Baseline         | 4.00    | 9.47 | <.001 | + GAD-7 Baseline      | 3.81    | 10.24 | <.001 |
| + IMS-12 Depression      | .67     | 1.84 | .073  | + IMS-12 Anxiety      | .97     | -2.44 | .019  |

<sup>A</sup>P values indicate whether the model provides a significant additional proportional reduction in errors relative to the previous model.

| IMS-12 Depression (n=17) |         |       |       | IMS-12 Anxiety (n=17) |         |       |       |
|--------------------------|---------|-------|-------|-----------------------|---------|-------|-------|
| Model                    | $\beta$ | t     | $P^A$ | Model                 | $\beta$ | t     | P     |
| Time                     | -.01    | -.04  | .96   | Time                  | -.03    | -.12  | .91   |
| + PHQ-9 Baseline         | 4.74    | 11.67 | <.001 | + GAD-7 Baseline      | 4.49    | 10.64 | <.001 |
| + IMS-12 Depression      | -.61    | -1.98 | .059  | + IMS-12 Anxiety      | -.85    | -2.29 | .027  |
